# Supplementary material
Source: PubMed Central journal article supplement (PMC6732336)
Supplement: mmc1.pdf [file mmc1.pdf]

## **Supplemental Information**

### **The Delivery of a Wnt Pathway Inhibitor Toward CSCs Requires Stable Liposome Encapsulation and Delayed Drug Release in Tumor Tissues**

**Chong Li, Yaoyao Liang, Jing Cao, Ning Zhang, Xiaohui Wei, Meiqing Tu, Fengwei Xu, and Yuhong Xu**

S1

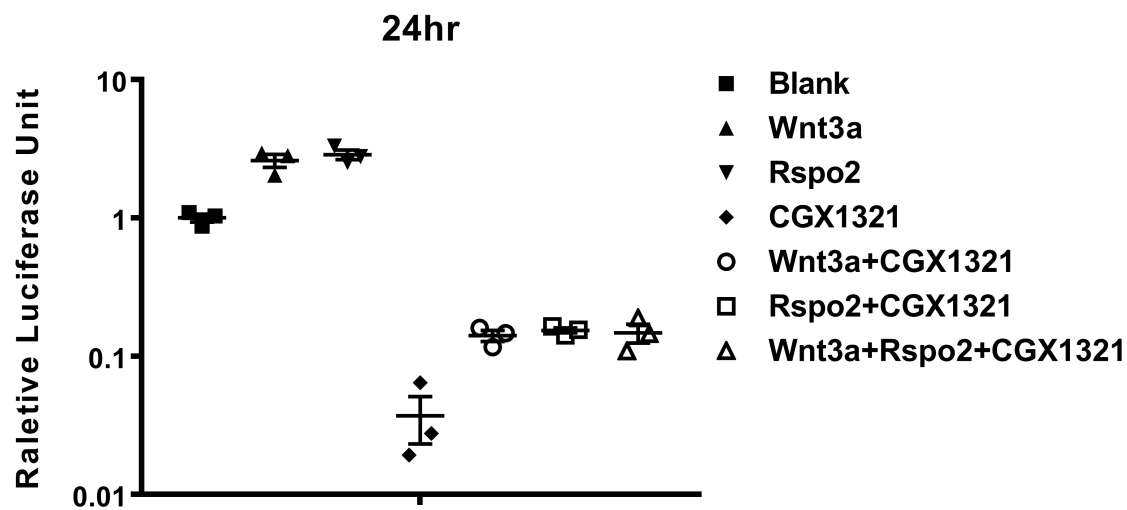

S2

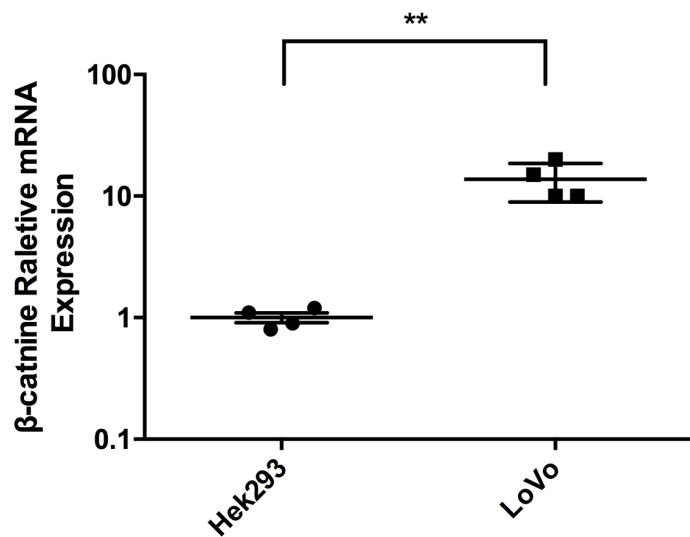

S3

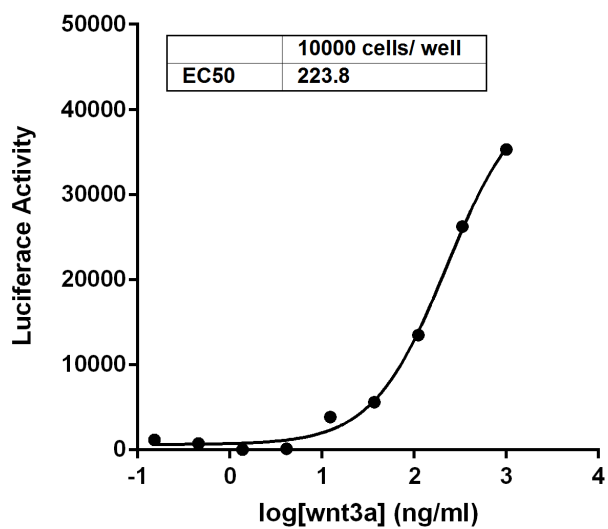

S4

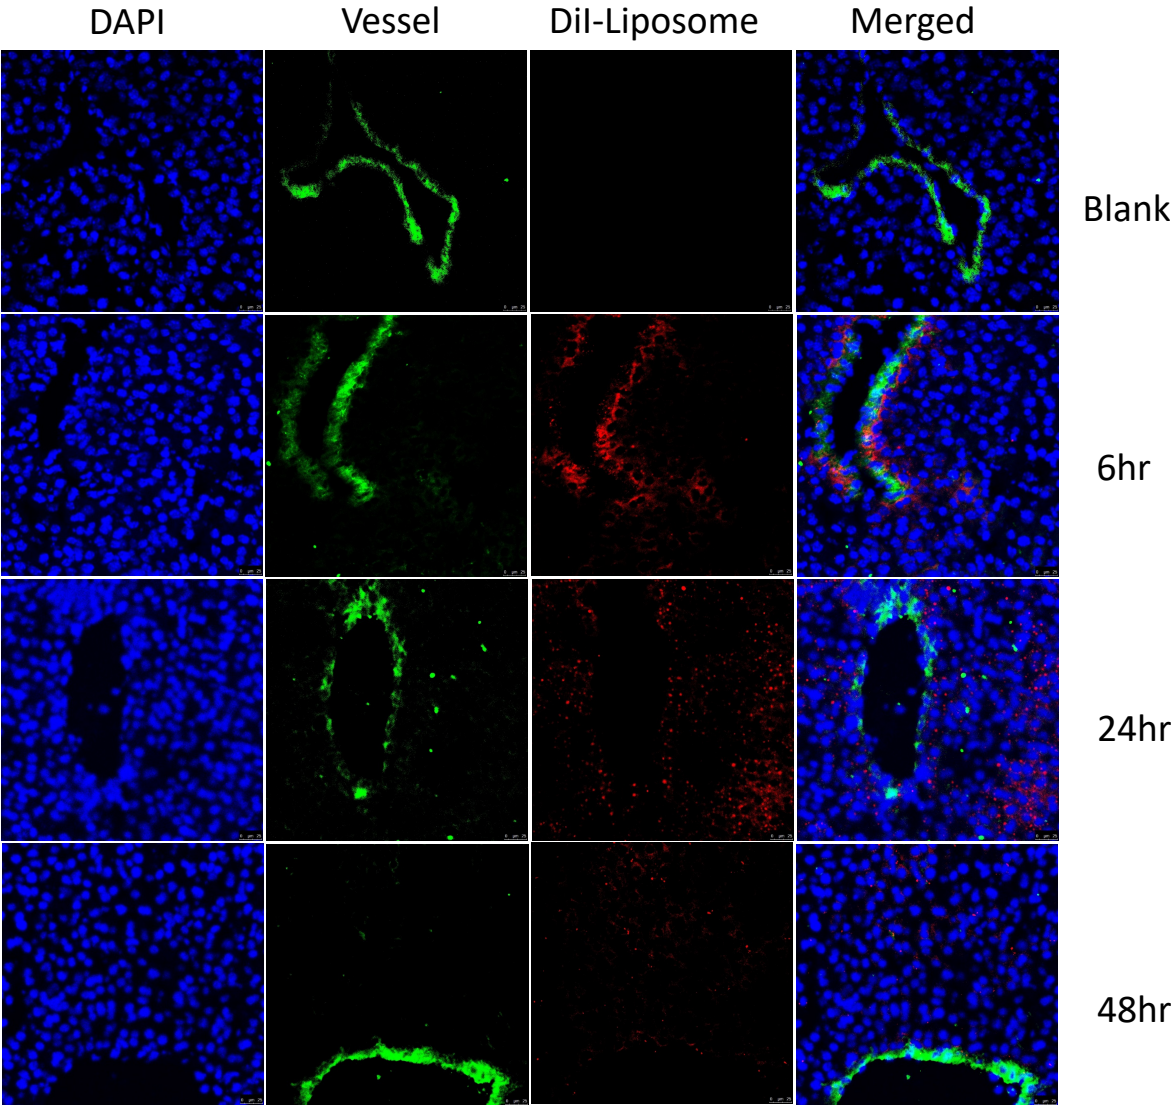

S5

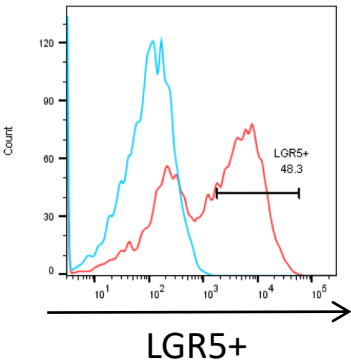

S6

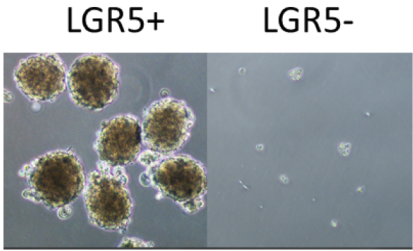

S7

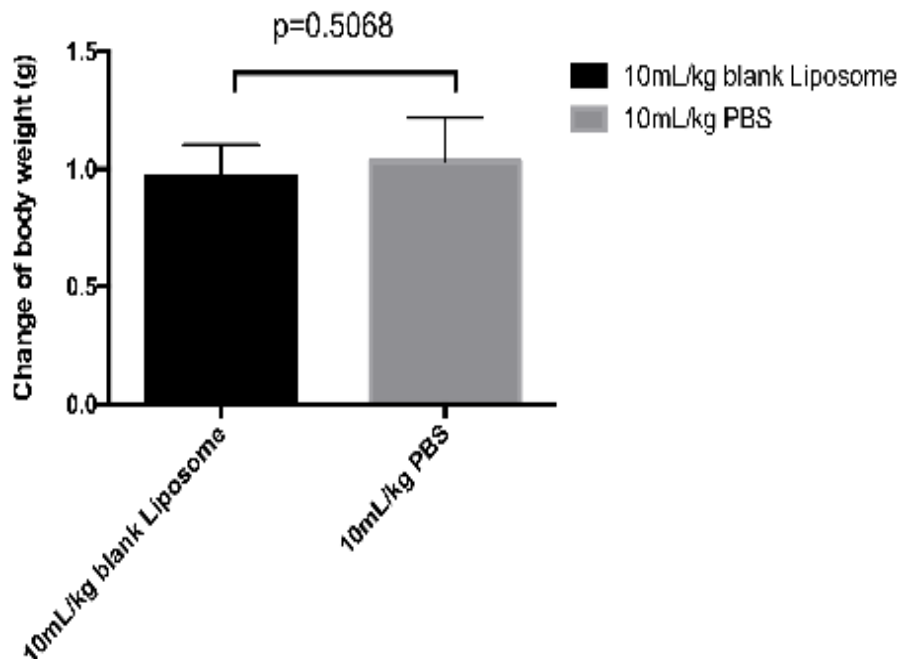

- S1, Luciferase activity assays in HEK293-TCF cells. Luciferase units were detected at 24 hrs after co-culture with RSPO2, Wnt3a and CGX1321. The concentrations of CGX1321 in medium is 20 $\mu$ M, Wnt3a concentration is 200ng/ml, Rspo2 concentration is 10ng/ml.
- S2, The confirmation of  $\beta$ -catenin expression in LoVo cells line by q-PCR.
- S3, Wnt3a or RSPO2 Cellular assay in HEK293-TCF cells.
- S4, Immunofluorescence staining in liver from GA007 PDX mice model after a single dosing of 10mg/kg liposome-CGX1321 (liposome concentration is 50mg/mL) via i.v. injection, detected by confocal microscopy. Scale Bar is 25  $\mu$ m.
- S5-6, Flow cytometry of LGR5+ cells from the GA007 PDX tumor single cells suspension. The gate shows LGR5 positive cells (s6). We sorted out these LGR5+ cells and 3D cultured them *in vitro*. They quickly grew into tumor-like spheroids, while the LGR5- cells had a low survival rate (S6). These LGR5+ cells were also injected subcutaneously into nude mice in order to analyze their tumor-initiating properties. As summarized, as few as 100 LGR5+ cells resulted in tumor formation in five out of the six mice, while as many as 100,000 LGR5- cells failed to initiate formation of any tumors (Supplemental table 2). Mice (n=6) were assessed over a time period of 21–55 days
- S7, Bodyweight change in liposome injection group and PBS injection group. There is no significant difference between blank liposome group and PBS group. P=0.5068, n=5

Supplemental Table 1

Primers used in this study

|                    |                        |
|--------------------|------------------------|
| LGR5-F             | CTGAACTAAGAACACTGA     |
| LGR5-R             | TTGAGGAAGAGATGAGAT     |
| GAPDH-F            | GAAGGTGAAGGTCGGAGT     |
| GAPDH-R            | GAAGATGGTGATGGGATTTC   |
| $\beta$ -catenin-F | GGTTGCCTTGCTCAACAAAA   |
| $\beta$ -catenin-R | TCCAAGGAGACCTTCCATC    |
| Axin2-F            | ATGTCTGGCAGTGGATGTTAG  |
| Axin2-R            | GACTCCAATGGGTAGCTCTTTC |

Supplemental Table 2

*Ex vivo* 100 Lgr5+ cells induced Xenograft

|           | Cells injected |                 |                 |                 |                 |
|-----------|----------------|-----------------|-----------------|-----------------|-----------------|
|           | 10             | 10 <sup>2</sup> | 10 <sup>3</sup> | 10 <sup>4</sup> | 10 <sup>5</sup> |
| Lgr5+cell | 0/6            | 5/6             | 6/6             | 6/6             | 6/6             |
| Lgr5-cell | 0/6            | 0/6             | 0/6             | 0/6             | 0/6             |
